# Supplementary material
Source: Springer Nature journal article supplement (https://www.springermedizin.de/resource/supplementary/12947_2004_33_MOESM7_ESM.pdf/9556040)

**a** HLA-DR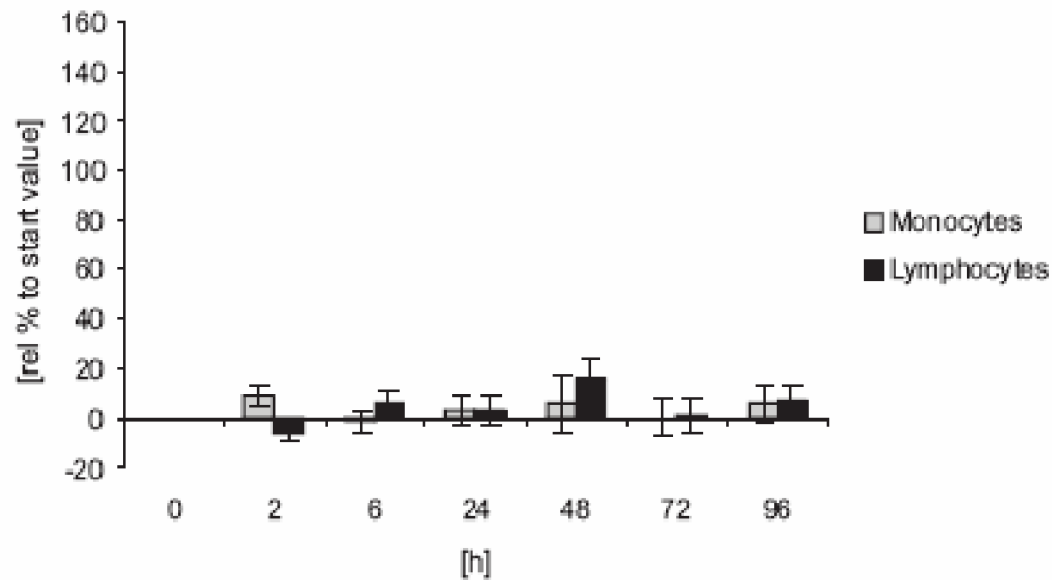**b** Cell Count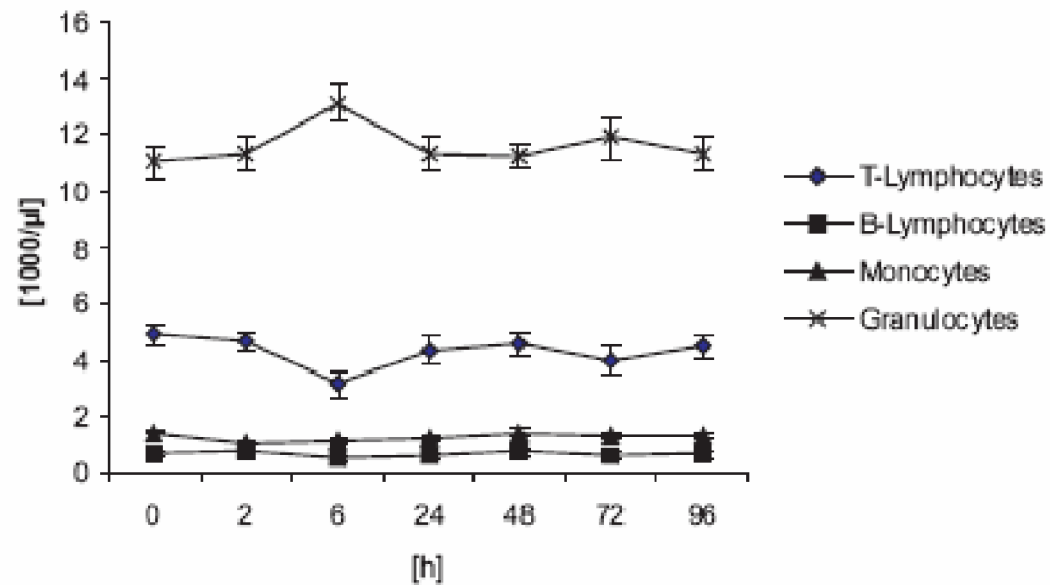

Supplement: MOESM7 [file 9556040]
